# Supplementary material for: Infodemiology and Infoveillance: Scoping Review
Source: PubMed Central journal article supplement (PMC7189791; doi:10.2196/16206), 2020-04-28

## Multimedia Appendix 2: Infodemiology and Infoveillance: A Scoping Review

Table A1 consists of the topics and subtopics (#publications) in infodemiology and infoveillance (2009-2018), while Figure 1 consists of the respective subtopics' pie charts.

**Table A1.** Topics and subtopics in infodemiology and infoveillance (2009-2018).

| Category                          | (%)    | Topics                             | #    | Category                              | (%)    | Topics                               | #    |
|-----------------------------------|--------|------------------------------------|------|---------------------------------------|--------|--------------------------------------|------|
| <b>Drugs</b>                      | 10.36% | Drugs (general)                    | (7)  | <b>Cancer</b>                         | 6.80%  | Cancer (general)                     | (6)  |
|                                   |        | Drug Abuse/Misuse                  | (6)  |                                       |        | Breast Cancer                        | (5)  |
|                                   |        | Cannabis/Marijuana                 | (5)  |                                       |        | Skin Cancer                          | (2)  |
|                                   |        | Adverse Drug Reactions             | (5)  |                                       |        | Lung Cancer                          | (2)  |
|                                   |        | Illicit Drugs                      | (5)  |                                       |        | Malignancies                         | (2)  |
|                                   |        | Pharmaceutical Drugs               | (3)  |                                       |        | Oncology                             | (1)  |
|                                   |        | Dabbing                            | (1)  |                                       |        | Cervical Cancer                      | (1)  |
|                                   |        | Antibiotics                        | (1)  |                                       |        | Colorectal Cancer                    | (1)  |
|                                   |        | Psychoactive Agents                | (1)  |                                       |        | Stomach cancer                       | (1)  |
| Reformulated OxyContin            | (1)    | Gynecologic cancer                 | (1)  |                                       |        |                                      |      |
|                                   |        |                                    |      |                                       |        | Alternative Medicines and Cancer     | (1)  |
| <b>Conditions Diseases</b>        | 17.16% | Diabetes                           | (8)  | <b>Epidemics Outbreaks</b>            | 15.68% | Influenza                            | (27) |
|                                   |        | Multiple Sclerosis                 | (6)  |                                       |        | Zika                                 | (5)  |
|                                   |        | Conditions/Diseases/Health general | (6)  |                                       |        | Measles                              | (4)  |
|                                   |        | Epilepsy                           | (5)  |                                       |        | dengue                               | (3)  |
|                                   |        | Lupus                              | (2)  |                                       |        | H1N1                                 | (2)  |
|                                   |        | Asthma                             | (2)  |                                       |        | H7N9                                 | (2)  |
|                                   |        | Lyme Disease                       | (2)  |                                       |        | Norovirus                            | (2)  |
|                                   |        | Neurology                          | (2)  |                                       |        | Mayaro virus                         | (1)  |
|                                   |        | Dementia                           | (2)  |                                       |        | Ebola                                | (1)  |
|                                   |        | Stroke                             | (2)  |                                       |        | West-Nile Virus                      | (1)  |
| Pertussis                         | (2)    | Rubella                            | (1)  |                                       |        |                                      |      |
| Various <sup>1</sup>              | (19)   | Cholera                            | (1)  |                                       |        |                                      |      |
|                                   |        |                                    |      |                                       |        | Acute Diarrhea                       | (1)  |
| <b>Mental Health</b>              | 8.28%  | Depression                         | (8)  | <b>Mother Child</b>                   | 2.66%  | Mass Casualty Incidents and Epidemic | (1)  |
|                                   |        | Suicide                            | (7)  |                                       |        | Disease Outbreaks in Mass Gatherings | (1)  |
|                                   |        | Stress                             | (3)  |                                       |        | Birth Stories                        | (1)  |
|                                   |        | Mental Health general              | (3)  |                                       |        | Abortion                             | (1)  |
|                                   |        | Schizophrenia                      | (2)  |                                       |        | "Mommy Blogs" and the Vaccination    | (1)  |
|                                   |        | Sleep issues                       | (1)  |                                       |        | Perinatal Deaths                     | (1)  |
|                                   |        | Non-suicidal self-injury (NSSI)    | (1)  |                                       |        | Pregnant Women                       | (1)  |
|                                   |        | Mental disorders                   | (1)  |                                       |        | Sudden Infant Death Syndrome         | (1)  |
| psychogenic nonepileptic seizures | (1)    | Children's Pain and Sleep          | (1)  |                                       |        |                                      |      |
| Cycling Mood Disorders            | (1)    | Cochrane Child Health              | (1)  |                                       |        |                                      |      |
|                                   |        |                                    |      |                                       |        | Common Cold Symptoms in Children     | (1)  |
| <b>Infectious Diseases</b>        | 7.99%  | HIV/AIDS                           | (8)  | <b>Diet Fitness Obesity Lifestyle</b> | 4.14%  | Fitness/Exercise                     | (5)  |
|                                   |        | HPV                                | (6)  |                                       |        | Physical Activity                    | (3)  |
|                                   |        | STDs                               | (5)  |                                       |        | Diet/Nutrition                       | (3)  |
|                                   |        | Syphilis                           | (2)  |                                       |        | Obesity/Weight Loss                  | (2)  |
|                                   |        | Tuberculosis,                      | (2)  | Lifestyle                             | (1)    |                                      |      |
|                                   |        | Staphylococcus aureus (MRSA),      | (1)  | <b>Health Care Hospitals/Patients</b> | 11.54% | Performance/Evaluation/Rating        | (21) |
|                                   |        | Herpes Zoster Vaccination          | (1)  |                                       |        | Dissemination/Integration            | (18) |
| Infectious diseases               | (1)    | Radiation                          | (3)  |                                       |        |                                      |      |
| Meningitis                        | (1)    |                                    |      | Obamacare                             | (2)    |                                      |      |
|                                   |        |                                    |      | Ethics                                | (2)    |                                      |      |
|                                   |        |                                    |      | (STAP) Cell Case                      | (2)    |                                      |      |
| <b>Smoking Alcohol</b>            | 8.58%  | Smoking/Tobacco                    | (11) | <b>Miscellaneous</b>                  | 9.76%  | Various <sup>2</sup>                 | (24) |
|                                   |        | electronic cigarette/vaping        | (10) |                                       |        |                                      |      |
|                                   |        | Hookah                             | (4)  |                                       |        |                                      |      |
|                                   |        | Cigarettes/Cigars                  | (2)  |                                       |        |                                      |      |
| alcohol                           | (2)    |                                    |      |                                       |        |                                      |      |

<sup>1</sup>Autism spectrum disorders; antiphospholipid syndrome; Attention Deficit Hyperactivity Disorder; B12-related symptoms; Whiplash; Crohn's Disease; rheumatology; silicosis; Fibromyalgia; Heart Failure Self-Care Management; Hirschsprung's Disease; Hypertension; Inflammatory Bowel Disease; Lynch Syndrome; Migraine-Headache Suffering; movement disorders; Thyroid Hormone; Tinnitus; Parkinson

<sup>2</sup>Anticoagulation in the Periprocedural Period; workplace compassion; Foodborne Illness; Ironman Triathlon; New York Storm; Sandy Hook Shooting; Bed bug; Nuclear Cardiac Stress Testing; Chiropractic and Spinal Manipulation Therapy; Freshman College Experience; Organ Donation; Stem Cell Treatment; Transgender; sex-seeking MSM; Uterine Power Morcellation; Change in Pap Smear Guidelines; Telemedicine; mHealth; Virtual Reality in Health Care; health search behavior; Health Travelers; menopause; femicide/mortality rates

**Figure A1:** Pie charts of the individual subtopics of the identified health categories.

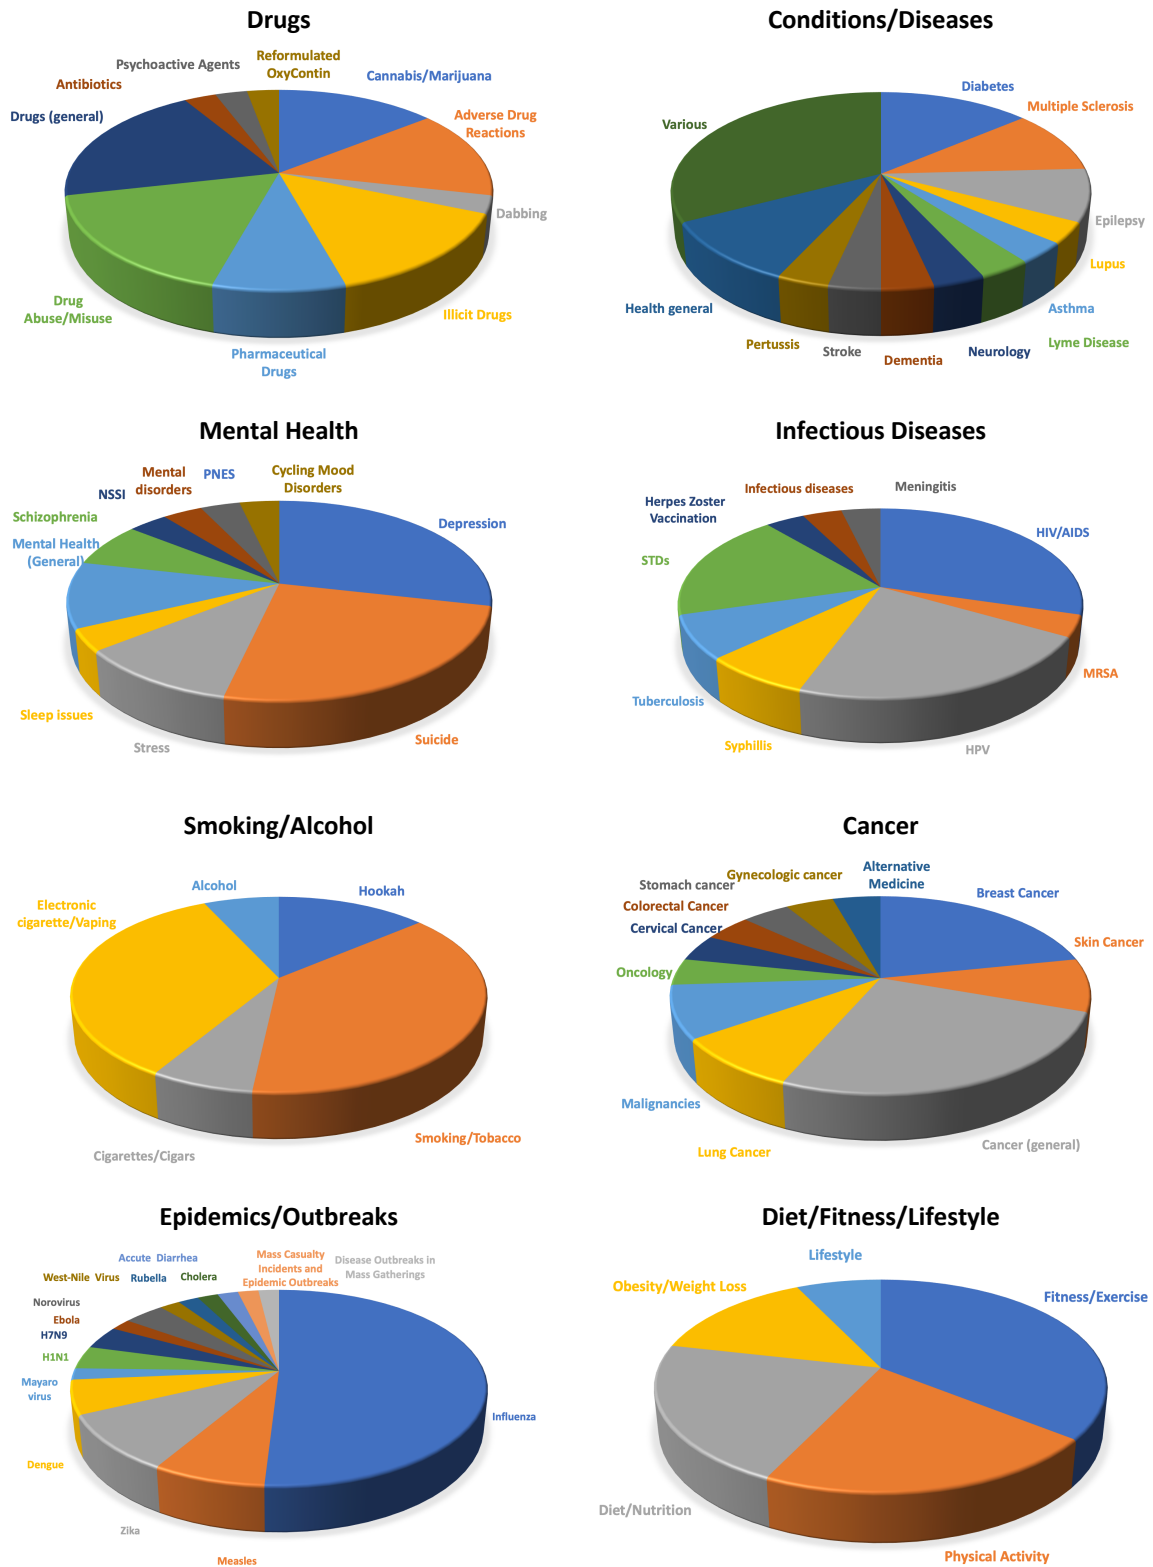

Supplement: jmir_v22i4e16206_app2.pdf [file jmir_v22i4e16206_app2.pdf]
